# Supplementary material for: Discovery of a Unique Set of Dog-Seroreactive Coccidioides Proteins Using Nucleic Acid Programmable Protein Array
Source: MDPI journal article supplement (doi:10.3390/jof10050307), 2024-04-24
Supplement: s1 [file s1]

## Supplemental Materials

| Naturally Infected dogs (N=17) |                |          |            |          |
|--------------------------------|----------------|----------|------------|----------|
| Protein                        | Seropositivity |          | Odds Ratio | p-value  |
|                                | Positive       | Negative | Positive   | Positive |
| CF                             | 80%            | 0%       | 400.0      | 1.44E-03 |
| CIMG_04988                     | 60%            | 0%       | 150.0      | 8.52E-03 |
| CIMG_05828                     | 60%            | 0%       | 150.0      | 8.52E-03 |
| CIMG_02401                     | 30%            | 0%       | 42.9       | 3.89E-02 |
| CIMG_04729                     | 30%            | 0%       | 42.9       | 3.89E-02 |
| CIMG_11455                     | 30%            | 0%       | 42.9       | 3.89E-02 |
| CIMG_10136                     | 20%            | 0%       | 25.0       | 5.34E-02 |
| CPSG_06799                     | 20%            | 0%       | 25.0       | 5.34E-02 |
| CIMG_00220                     | 10%            | 0%       | 11.1       | 6.84E-02 |
| CIMG_06562                     | 10%            | 0%       | 11.1       | 6.84E-02 |
| CIMG_06738                     | 10%            | 0%       | 11.1       | 6.84E-02 |
| CIMG_07827                     | 10%            | 0%       | 11.1       | 6.84E-02 |
| CIMG_10149                     | 10%            | 0%       | 11.1       | 6.84E-02 |
| CIHG_08476                     | 10%            | 0%       | 11.1       | 6.84E-02 |
| CIMG_12861                     | 40%            | 0%       | 66.7       | 2.61E-02 |
| CIMG_07322                     | 30%            | 0%       | 42.9       | 3.89E-02 |
| CIMG_05911                     | 20%            | 0%       | 25.0       | 5.34E-02 |
| CIMG_06723                     | 20%            | 0%       | 25.0       | 5.34E-02 |
| CIMG_00627                     | 10%            | 0%       | 11.1       | 6.84E-02 |
| CIMG_00965                     | 10%            | 0%       | 11.1       | 6.84E-02 |
| CIMG_01310                     | 10%            | 0%       | 11.1       | 6.84E-02 |
| CIMG_01552                     | 10%            | 0%       | 11.1       | 6.84E-02 |
| CIMG_01749                     | 10%            | 0%       | 11.1       | 6.84E-02 |
| CIMG_02699                     | 10%            | 0%       | 11.1       | 6.84E-02 |
| CIMG_03708                     | 10%            | 0%       | 11.1       | 6.84E-02 |
| CIMG_05579                     | 10%            | 0%       | 11.1       | 6.84E-02 |
| CIMG_06320                     | 10%            | 0%       | 11.1       | 6.84E-02 |
| CIMG_06998                     | 10%            | 0%       | 11.1       | 6.84E-02 |
| CIMG_07263                     | 10%            | 0%       | 11.1       | 6.84E-02 |
| CIMG_09143                     | 10%            | 0%       | 11.1       | 6.84E-02 |
| CIMG_09691                     | 10%            | 0%       | 11.1       | 6.84E-02 |
| CIMG_12767                     | 10%            | 0%       | 11.1       | 6.84E-02 |
| CIMG_13032                     | 10%            | 0%       | 11.1       | 6.84E-02 |

Table S1. Naturally Infected Dogs Table. This table shows the seropositivity, Odds ratio, as well as the p-value for the naturally infected dogs (N=17). Seropositivity goes from dark blue (0%) to dark red (100%), odds-ratios go from light blue (0) to dark red (>10), with p-values highlighted in green if they are significant (<0.05).

| Laboratory Infected Dogs (N=18) |                |     |     |     |     |            |     |     |     |          |         |         |         |
|---------------------------------|----------------|-----|-----|-----|-----|------------|-----|-----|-----|----------|---------|---------|---------|
|                                 | Seropositivity |     |     |     |     | Odds Ratio |     |     |     | p-values |         |         |         |
| Protein                         | C0             | C2  | C4  | C6  | C8  | C2         | C4  | C6  | C8  | C2       | C4      | C6      | C8      |
| CF                              | 2%             | 0%  | 81% | ### | ### | 0          | 191 | ### | ### | 2.6E-01  | 3.7E-13 | 3.2E-15 | 1.6E-12 |
| CIMG_04988                      | 2%             | 0%  | 50% | 71% | 82% | 0          | 44  | 110 | 198 | 2.6E-01  | 1.3E-07 | 3.7E-10 | 6.5E-10 |
| CIMG_05828                      | 2%             | 0%  | 6%  | 29% | 45% | 0          | 3   | 18  | 37  | 2.6E-01  | 1.2E-01 | 6.7E-04 | 3.2E-05 |
| CIMG_02401                      | 0%             | 0%  | 6%  | 21% | 18% | 1          | 7   | 27  | 22  | 2.8E-01  | 3.1E-02 | 6.3E-04 | 4.9E-03 |
| CIMG_04729                      | 2%             | 7%  | 31% | 29% | 27% | 3          | 20  | 18  | 17  | 1.7E-01  | 8.6E-05 | 6.7E-04 | 3.8E-03 |
| CIMG_11455                      | 2%             | 0%  | 6%  | 7%  | 18% | 0          | 3   | 3   | 10  | 2.6E-01  | 1.2E-01 | 2.2E-01 | 3.5E-02 |
| CIMG_10136                      | 7%             | 0%  | 13% | 14% | 27% | 0          | 2   | 2   | 5   | 1.5E-01  | 1.3E-01 | 2.1E-01 | 4.8E-02 |
| CPSG_06799                      | 0%             | 47% | 75% | 79% | 64% | 88         | 300 | 367 | 175 | 8.4E-08  | 4.2E-13 | 1.7E-12 | 1.5E-08 |
| CIMG_00220                      | 2%             | 7%  | 13% | 0%  | 18% | 3          | 6   | 0   | 10  | 1.7E-01  | 2.6E-02 | 3.8E-01 | 3.5E-02 |
| CIMG_06562                      | 0%             | 33% | 19% | 14% | 36% | 50         | 23  | 17  | 57  | 8.0E-06  | 5.4E-04 | 5.6E-03 | 3.7E-05 |
| CIMG_06738                      | 9%             | 27% | 13% | 14% | 36% | 4          | 1   | 2   | 6   | 2.9E-02  | 1.7E-01 | 3.1E-01 | 2.0E-02 |
| CIMG_07827                      | 7%             | 27% | 19% | 21% | 36% | 5          | 3   | 4   | 8   | 1.2E-02  | 4.4E-02 | 6.0E-02 | 7.6E-03 |
| CIMG_10149                      | 0%             | 13% | 13% | 7%  | 18% | 15         | 14  | 8   | 22  | 5.0E-03  | 4.1E-03 | 5.0E-02 | 4.9E-03 |
| CIHG_08476                      | 0%             | 20% | 19% | 0%  | 27% | 25         | 23  | 1   | 38  | 6.1E-04  | 5.4E-04 | 4.0E-01 | 4.4E-04 |
| CIMG_12861                      | 11%            | 0%  | 25% | 14% | 0%  | 0          | 3   | 1   | 0   | 8.5E-02  | 4.8E-02 | 3.9E-01 | 2.9E-01 |
| CIMG_07322                      | 2%             | 0%  | 13% | 14% | 0%  | 0          | 6   | 7   | 0   | 2.6E-01  | 2.6E-02 | 3.8E-02 | 7.8E-01 |
| CIMG_05911                      | 0%             | 0%  | 6%  | 0%  | 0%  | 1          | 7   | 1   | 1   | 2.8E-01  | 3.1E-02 | 4.0E-01 | 7.3E-01 |
| CIMG_06723                      | 7%             | 13% | 25% | 7%  | 0%  | 2          | 5   | 1   | 0   | 1.7E-01  | 1.1E-02 | 4.3E-01 | 4.5E-01 |
| CIMG_00627                      | 0%             | 0%  | 0%  | 0%  | 9%  | 1          | 1   | 1   | 10  | 2.8E-01  | 1.9E-01 | 4.0E-01 | 5.7E-02 |
| CIMG_00965                      | 4%             | 0%  | 0%  | 7%  | 18% | 0          | 0   | 2   | 5   | 2.0E-01  | 1.3E-01 | 3.7E-01 | 1.1E-01 |
| CIMG_01310                      | 0%             | 7%  | 0%  | 7%  | 0%  | 7          | 1   | 8   | 1   | 4.1E-02  | 1.9E-01 | 5.0E-02 | 7.3E-01 |
| CIMG_01552                      | 0%             | 0%  | 0%  | 0%  | 9%  | 1          | 1   | 1   | 10  | 2.8E-01  | 1.9E-01 | 4.0E-01 | 5.7E-02 |
| CIMG_01749                      | 4%             | 0%  | 0%  | 7%  | 18% | 0          | 0   | 2   | 5   | 2.0E-01  | 1.3E-01 | 3.7E-01 | 1.1E-01 |
| CIMG_02699                      | 2%             | 7%  | 0%  | 0%  | 9%  | 3          | 0   | 0   | 4   | 1.7E-01  | 1.7E-01 | 3.8E-01 | 2.7E-01 |
| CIMG_03708                      | 0%             | 0%  | 6%  | 0%  | 0%  | 1          | 7   | 1   | 1   | 2.8E-01  | 3.1E-02 | 4.0E-01 | 7.3E-01 |
| CIMG_05579                      | 0%             | 7%  | 6%  | 7%  | 9%  | 7          | 7   | 8   | 10  | 4.1E-02  | 3.1E-02 | 5.0E-02 | 5.7E-02 |
| CIMG_06320                      | 0%             | 7%  | 0%  | 0%  | 0%  | 7          | 1   | 1   | 1   | 4.1E-02  | 1.9E-01 | 4.0E-01 | 7.3E-01 |
| CIMG_06998                      | 0%             | 0%  | 0%  | 0%  | 9%  | 1          | 1   | 1   | 10  | 2.8E-01  | 1.9E-01 | 4.0E-01 | 5.7E-02 |
| CIMG_07263                      | 0%             | 0%  | 6%  | 0%  | 0%  | 1          | 7   | 1   | 1   | 2.8E-01  | 3.1E-02 | 4.0E-01 | 7.3E-01 |
| CIMG_09143                      | 4%             | 7%  | 19% | 7%  | 18% | 2          | 5   | 2   | 5   | 2.7E-01  | 1.8E-02 | 3.7E-01 | 1.1E-01 |
| CIMG_09691                      | 7%             | 13% | 0%  | 0%  | 9%  | 2          | 0   | 0   | 1   | 1.7E-01  | 9.6E-02 | 2.2E-01 | 7.8E-01 |
| CIMG_12767                      | 2%             | 13% | 0%  | 0%  | 9%  | 7          | 0   | 0   | 4   | 3.3E-02  | 1.7E-01 | 3.8E-01 | 2.7E-01 |
| CIMG_13032                      | 0%             | 7%  | 6%  | 0%  | 0%  | 7          | 7   | 1   | 1   | 4.1E-02  | 3.1E-02 | 4.0E-01 | 7.3E-01 |

Table S2. Laboratory Infected Dogs Table. This table shows the seropositivity, Odds ratio, as well as the p-value for the laboratory infected dogs (N=18). Values are shown for each timepoint. Seropositivity goes from dark blue (0%) to dark red (100%), odds-ratios go from light blue (0) to dark red (>10), with p-values highlighted in green if they are significant (<0.05).

| Vaccinated + Challenged Dogs (N=6) |                |     |     |     |     |            |    |    |         |          |         |         |         |
|------------------------------------|----------------|-----|-----|-----|-----|------------|----|----|---------|----------|---------|---------|---------|
| Vaccine                            | Seropositivity |     |     |     |     | Odds Ratio |    |    |         | p-values |         |         |         |
| Protein                            | V0             | V2  | V4  | V6  | C0  | V2         | V4 | V6 | C0      | V2       | V4      | V6      | C0      |
| CF                                 | 0%             | 0%  | 50% | 67% | 33% | 1          | 10 | 20 | 5       | 7.5E-01  | 5.6E-02 | 1.8E-02 | 1.5E-01 |
| CIMG_01749                         | 0%             | 0%  | 17% | 33% | 50% | 1          | 2  | 5  | 10      | 7.5E-01  | 3.7E-01 | 1.5E-01 | 5.6E-02 |
| CIMG_04729                         | 0%             | 0%  | 17% | 50% | 0%  | 1          | 2  | 10 | 1       | 7.5E-01  | 3.7E-01 | 5.6E-02 | 7.5E-01 |
| CIMG_04988                         | 0%             | 17% | 50% | 67% | 67% | 2          | 10 | 20 | 20      | 3.7E-01  | 5.6E-02 | 1.8E-02 | 1.8E-02 |
| CIMG_05828                         | 0%             | 0%  | 17% | 17% | 0%  | 1          | 2  | 2  | 1       | 7.5E-01  | 3.7E-01 | 3.7E-01 | 7.5E-01 |
| CIMG_10136                         | 0%             | 17% | 17% | 33% | 33% | 2          | 2  | 5  | 5       | 3.7E-01  | 3.7E-01 | 1.5E-01 | 1.5E-01 |
| CIMG_11455                         | 0%             | 17% | 33% | 33% | 33% | 2          | 5  | 5  | 5       | 3.7E-01  | 1.5E-01 | 1.5E-01 | 1.5E-01 |
| CPSG_05795                         | 0%             | 50% | 33% | 83% | 67% | 10         | 5  | 50 | 20      | 5.6E-02  | 1.5E-01 | 4.2E-03 | 1.8E-02 |
| Challenge                          | Seropositivity |     |     |     |     | Odds Ratio |    |    |         | p-values |         |         |         |
| Protein                            | C2             | C4  | C6  | C8  | C2  | C4         | C6 | C8 | C2      | C4       | C6      | C8      |         |
| CF                                 | 33%            | 50% | 50% | 67% | 5   | 10         | 10 | 20 | 1.5E-01 | 5.6E-02  | 5.6E-02 | 1.5E-01 |         |
| CIMG_01749                         | 0%             | 17% | 33% | 17% | 1   | 2          | 5  | 2  | 7.5E-01 | 3.7E-01  | 1.5E-01 | 3.7E-01 |         |
| CIMG_04729                         | 0%             | 17% | 17% | 17% | 1   | 2          | 2  | 2  | 7.5E-01 | 3.7E-01  | 3.7E-01 | 3.7E-01 |         |
| CIMG_04988                         | 33%            | 50% | 67% | 50% | 5   | 10         | 20 | 10 | 1.5E-01 | 5.6E-02  | 1.8E-02 | 5.6E-02 |         |
| CIMG_05828                         | 0%             | 17% | 17% | 17% | 1   | 2          | 2  | 2  | 7.5E-01 | 3.7E-01  | 3.7E-01 | 3.7E-01 |         |
| CIMG_10136                         | 17%            | 17% | 33% | 17% | 2   | 2          | 5  | 2  | 3.7E-01 | 3.7E-01  | 1.5E-01 | 3.7E-01 |         |
| CIMG_11455                         | 33%            | 33% | 17% | 17% | 5   | 5          | 2  | 2  | 1.5E-01 | 1.5E-01  | 3.7E-01 | 3.7E-01 |         |
| CPSG_05795                         | 83%            | 67% | 83% | 67% | 50  | 20         | 50 | 20 | 4.2E-03 | 1.8E-02  | 4.2E-03 | 1.8E-02 |         |

Table S3. Vaccinated + Challenged Dogs Table. This table shows the seropositivity, Odds ratio, as well as the p-value for the vaccinated + challenged dogs (N=6). Values are shown for each timepoint. Seropositivity goes from dark blue (0%) to dark red (100%), odds-ratios go from light blue (0) to dark red (>10), with p-values highlighted in green if they are significant (<0.05).
